# Supplementary material
Source: ML conference proceedings conference paper supplement (https://openaccess.thecvf.com/content/ICCV2023/html/Wang_Iterative_Soft_Shrinkage_Learning_for_Efficient_Image_Super-Resolution_ICCV_2023_paper.html)
Supplement: Supplementary file 1 [file Wang_Iterative_Soft_Shrinkage_Learning_for_Efficient_Image_Super-Resolution_ICCV_2023_supplemental.pdf]

# Supplementary Material of “Iterative Soft Shrinkage Learning for Efficient Image Super-Resolution”

Jiamian Wang<sup>1</sup>, Huan Wang<sup>2</sup>, Yulun Zhang<sup>3\*</sup>, Yun Fu<sup>2</sup>, and Zhiqiang Tao<sup>1\*</sup>  
<sup>1</sup>Rochester Institute of Technology, <sup>2</sup>Northeastern University, <sup>3</sup>ETH Zürich

## 1. Overview

In this supplementary material, we present additional results and analyses about the proposed method as follows.

- A more detailed and comprehensive illustration to the performance comparison (Section 2).
- Ablation studies under high pruning ratios (Section 3).
- More visualization comparisons (Section 4).
- More discussions about the dynamics of the sparse structure and trainability preserving (Section 5).

## 2. Compared Methods

**ASSL.** ASSL [9] prunes the filters of the convolutional layers across different residual blocks, which cannot be easily extended to the novel structures, *e.g.*, multi-layer perceptron, multi-head self-attention, etc. To improve the adaptability of ASSL, we implement this method in a weight pruning fashion by following their designing principles.

Firstly, ASSL selects the last convolutional layers of all residual blocks as *constrained* layers, whose pruned filter indexes should be kept the same across the whole network for the residual connection concern. All the other convolutional layers can be pruned without structural constraints, which are termed as *free* layers. Similarly, we retain this structural constraint by categorizing the learnable layers before the any residual connection as the *constrained* ones, whose pruned wight indexes are consistent to one another, while others are *free* layers without structural constraints.

To select the pruned filter indexes in the *constrained* layers, ASSL firstly employs the weight normalization [8] as an indicator of the filter importance, which in our case, can be directly inferred from the weight magnitudes. Thereby, no additional weight normalization is needed in our setting.

To align the selected filter indexes across different *constrained* layers, ASSL collects the index vectors of each *constrained* layers and encourages their consistency by maximizing the inner-product of the index vectors, yielding

a sparsity structure alignment (SSA) penalty. Alternatively, we follow the same practice by regularizing the weight indexes rather than filter indexes.

Except for the above adaptations, we strictly follow the implementation of ASSL. To sum up, by retaining the key design principles (*i.e.*, filter alignment, SSA regularization, etc.) of ASSL, we deliver an enhanced version of ASSL, which is readily compatible with the off-the-shelf SR network designs in the scenario of weight pruning.

**SRP.** Another representative work of SRP [10] is also dedicated to the pruned filter index alignment considering the residual connection issue. This method selects the indexes of pruned filters across different *constrained* layers in a random manner prior to the training. Then the selected filters are shrunk by an  $L_2$  regularization with a growing schedule. Typically, the regularization encompasses  $L_2$ -norm of all unimportant filters in the network.

Here, we directly change the pruning units from the filters to the weights throughout the network and follow the same regularization arrangement as SRP. Notably, both of ASSL and SRP are raised upon a pre-trained SR network. In our setting, the pruning is directly conducted upon the network with random initialization.

**N:M Sparsity.** Besides compared methods, another emerging trend of weight pruning is to employ the N:M sparsity [2, 6]. This technology serves as an *hardware-driven standard/regulation* proposed to take advantage of the real-world accelerations upon novel computational platforms (*e.g.*, NVIDIA Ampere GPUs). The proposed method fundamentally different from them by delivering a highly-adaptable solution for the diverse SR network architectures *in a algorithm-motivated perspective*. N:M sparsity is orthogonal to our treatment (Section 2 in the manuscript).

However, to better evaluate the effectiveness of the proposed method, We also compare ISS-P with the the most recent method of SLS [7], following N:M sparsity. Note that, this method handles the convolutional networks by customizing the convolutional layers with structural constraints, but not explores and evaluates other types of the neural structures like the Transformer. Therefore, we perform the comparison on the representative EDSR-L [5] backbone.

\*Corresponding authors: Yulun Zhang (yulun100@gmail.com) and Zhiqiang Tao (zxtics@rit.edu)

| Backbones | Methods        | Set5  |        | Set14 |        | B100  |        | Urban100 |        | Manga109 |        |
|-----------|----------------|-------|--------|-------|--------|-------|--------|----------|--------|----------|--------|
|           |                | PSNR  | SSIM   | PSNR  | SSIM   | PSNR  | SSIM   | PSNR     | SSIM   | PSNR     | SSIM   |
| EDSR-L    | scratch        | 29.60 | 0.8522 | 26.35 | 0.7312 | 25.92 | 0.7003 | 23.69    | 0.7303 | 27.28    | 0.8570 |
|           | $L_1$ norm [3] | 29.61 | 0.8526 | 26.36 | 0.7318 | 25.93 | 0.7011 | 23.70    | 0.7313 | 27.35    | 0.8582 |
|           | ASSL [9]       | 29.85 | 0.8568 | 26.54 | 0.7368 | 26.07 | 0.7064 | 24.09    | 0.7461 | 27.93    | 0.8690 |
|           | SRP [10]       | 29.78 | 0.8558 | 26.47 | 0.7349 | 26.02 | 0.7036 | 23.89    | 0.7392 | 27.72    | 0.8656 |
|           | SLS [7]        | 29.76 | 0.8558 | 26.41 | 0.7339 | 25.95 | 0.7029 | 23.76    | 0.7369 | 27.39    | 0.8576 |
|           | ISS-P (ours)   | 30.23 | 0.8628 | 26.74 | 0.7428 | 26.21 | 0.7109 | 24.43    | 0.7596 | 28.51    | 0.8783 |

Table 1. A more comprehensive performance comparison of different methods upon the representative CNN backbone, EDSR-L [5] at the scale of the  $\times 4$ . The method [7] following the N:M sparsity standard is also incorporated. The pruning ratio is 0.95.

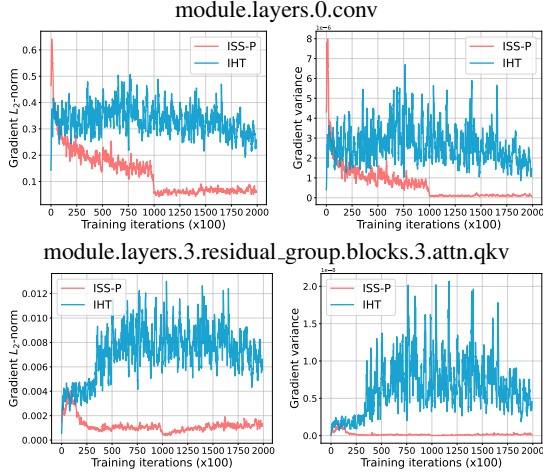

Figure 1. Trainability comparison of ISS-P and IHT. The layer-wise gradient  $L_2$ -norm and variance in the pruning stage ( $1 \times 10^5$  iterations) and the first  $1 \times 10^5$  iterations of fine-tuning stage are plotted. We choose two representative layers, *i.e.*, a convolution (top) and a linear layer (bottom) from the SwinIR-Lightweight.

Specifically, we employ the SLS by pruning the convolutional layers in the residual blocks and the upsampling module. The N:M sparsity is chosen as 2:32 for a pruning ratio of 0.94. We leverage the same training datasets and data preprocessing operations as the manuscript (Section 4 in the manuscript). By comparison, the proposed method outperforms compared methods including SLS. Considering the orthogonal property, one can easily integrate both trends for a potential hardware acceleration on diverse network designs with weight pruning strategy.

### 3. Ablation Study

The behaviour of the pruning methods can be different under different pruning ratios. Therefore, we systematically compare the performances of IHT, ISS-R, and ISS-P under very high pruning ratios (*i.e.*, 0.95 and 0.99). As shown by Tables 2 and 3, ISS-P outperforms the ablated methods at different scales, which is consistent with the results under the ratio of 0.9 (Table 2 in the manuscript). Note that the performance gaps between ISS-P and ablated methods grow as the scale or pruning ratio increases. This is because ISS-P not only better selects the sparse structure, but also retains trainability of the sparse network (see Section 5).

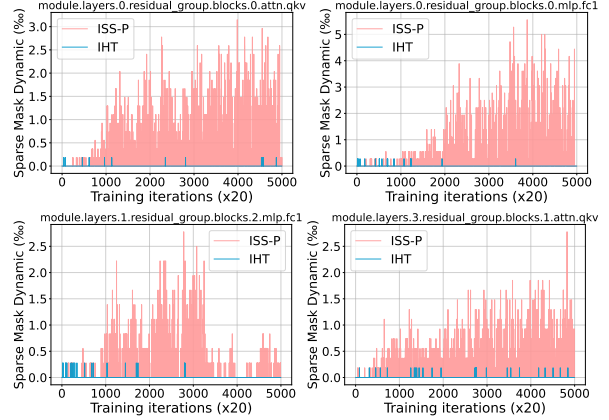

Figure 2. Dynamics of the Sparse structure induced by ISS-P and IHT in the pruning stage. The proposed method, ISS-P, allows a more active sparse pattern exploitation adapting to the optimization. We choose four representative layers (*i.e.*, 1st, 3rd, 36-th, and 80-th) from the SwinIR-Lightweight backbone [4].

### 4. Visualization Comparison

In Figs. 3~12, we provide more visualization of different methods under the a very high pruning ratio of 0.99 and scale of  $\times 4$ , which is the most challenging scenario. The proposed performs better by introducing less distortions, especially on high-frequency textured patterns, indicating the strong modeling capacity of the selected sparse structure.

### 5. Model Discussion

Both the proposed ISS-P and IHT select the unimportant weights per layer in each iteration. Therefore, measuring the number of weights that are categorized into different importance groups between the consecutive iterations helps infer the effect of the pruning methods. In Fig. 2, we provide more visualizations of representative layers in SwinIR-Lightweight. The weight significance flips in ISS-P happens more frequent than that of IHT, which means the proposed method potentially pursues more sparse possibilities in an active manner. We also provide more visualizations of the gradient statistics on different layers in Fig. 1. The gradient  $L_2$ -norm of ISS-P presents a preferred convergence tendency over the IHT regardless of the layer structures, which indicates the promising adaptability of the proposed method across different neural architectures.

| Methods | Scale      | Set5  |        | Set14 |        | B100  |        | Urban100 |        | Manga109 |        |
|---------|------------|-------|--------|-------|--------|-------|--------|----------|--------|----------|--------|
|         |            | PSNR  | SSIM   | PSNR  | SSIM   | PSNR  | SSIM   | PSNR     | SSIM   | PSNR     | SSIM   |
| IHT     | $\times 2$ | 35.17 | 0.9448 | 31.49 | 0.8978 | 30.57 | 0.8781 | 27.95    | 0.8740 | 32.91    | 0.9519 |
| ISS-R   | $\times 2$ | 35.37 | 0.9462 | 31.60 | 0.8983 | 30.66 | 0.8790 | 28.10    | 0.8730 | 33.31    | 0.9543 |
| ISS-P   | $\times 2$ | 35.86 | 0.9496 | 31.89 | 0.9015 | 30.87 | 0.8819 | 28.40    | 0.8777 | 34.09    | 0.9584 |
| IHT     | $\times 3$ | 32.96 | 0.9124 | 29.41 | 0.8247 | 28.44 | 0.7884 | 26.23    | 0.8030 | 30.61    | 0.9158 |
| ISS-R   | $\times 3$ | 32.92 | 0.9122 | 29.38 | 0.8239 | 28.43 | 0.7880 | 26.22    | 0.8027 | 30.57    | 0.9121 |
| ISS-P   | $\times 3$ | 33.28 | 0.9161 | 29.59 | 0.8282 | 28.58 | 0.7919 | 26.55    | 0.8123 | 31.28    | 0.9233 |
| IHT     | $\times 4$ | 30.61 | 0.8661 | 27.57 | 0.7567 | 26.93 | 0.7143 | 24.49    | 0.7258 | 27.49    | 0.8562 |
| ISS-R   | $\times 4$ | 30.69 | 0.8677 | 27.61 | 0.7576 | 26.96 | 0.7151 | 24.52    | 0.7273 | 27.61    | 0.8583 |
| ISS-P   | $\times 4$ | 30.97 | 0.8733 | 27.77 | 0.7619 | 27.05 | 0.7187 | 24.73    | 0.7360 | 28.00    | 0.8669 |

Table 2. Ablation study of different methods under the pruning ratio of 0.95 at different scales.

| Methods | Scale      | Set5  |        | Set14 |        | B100  |        | Urban100 |        | Manga109 |        |
|---------|------------|-------|--------|-------|--------|-------|--------|----------|--------|----------|--------|
|         |            | PSNR  | SSIM   | PSNR  | SSIM   | PSNR  | SSIM   | PSNR     | SSIM   | PSNR     | SSIM   |
| IHT     | $\times 2$ | 35.17 | 0.9448 | 31.49 | 0.8978 | 30.57 | 0.8781 | 27.95    | 0.8740 | 32.91    | 0.9519 |
| ISS-R   | $\times 2$ | 35.37 | 0.9462 | 31.60 | 0.8983 | 30.66 | 0.8790 | 28.10    | 0.8730 | 33.31    | 0.9543 |
| ISS-P   | $\times 2$ | 35.86 | 0.9496 | 31.89 | 0.9015 | 30.87 | 0.8819 | 28.39    | 0.8777 | 34.09    | 0.9584 |
| IHT     | $\times 3$ | 31.35 | 0.8853 | 28.35 | 0.8035 | 27.75 | 0.7697 | 25.07    | 0.7630 | 28.03    | 0.8742 |
| ISS-R   | $\times 3$ | 30.94 | 0.8806 | 28.09 | 0.7990 | 27.64 | 0.7660 | 24.92    | 0.7578 | 27.56    | 0.8676 |
| ISS-P   | $\times 3$ | 31.87 | 0.8960 | 28.71 | 0.8102 | 27.98 | 0.7753 | 25.42    | 0.7754 | 28.78    | 0.8889 |
| IHT     | $\times 4$ | 29.13 | 0.8249 | 26.57 | 0.7261 | 26.34 | 0.6916 | 23.57    | 0.6801 | 25.55    | 0.7893 |
| ISS-R   | $\times 4$ | 29.09 | 0.8243 | 26.32 | 0.7260 | 26.32 | 0.6912 | 23.55    | 0.6788 | 25.49    | 0.7977 |
| ISS-P   | $\times 4$ | 29.39 | 0.8331 | 26.73 | 0.7313 | 26.44 | 0.6952 | 23.70    | 0.6873 | 25.81    | 0.8085 |

Table 3. Ablation study of different methods under the pruning ratio of 0.99 at different scales.

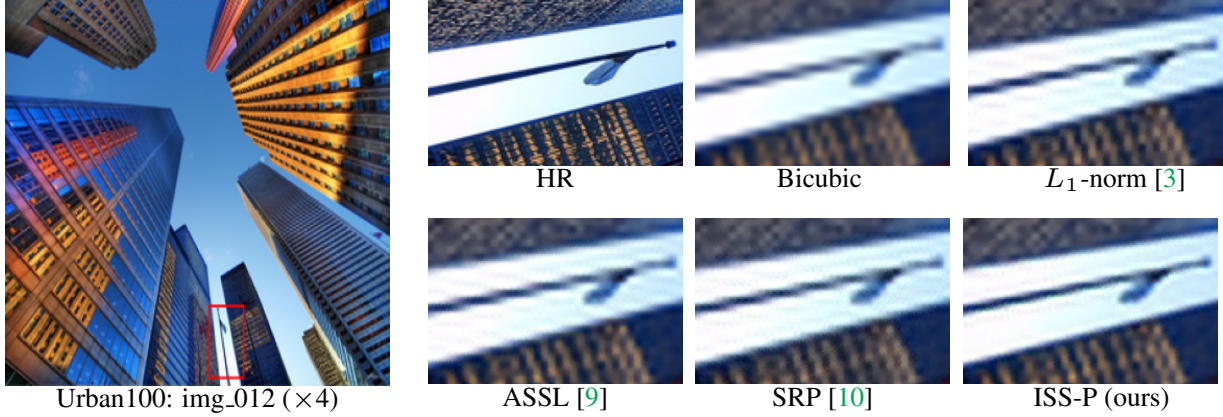

Figure 3. Visualization comparison of different pruning methods on Urban100 [1] dataset. The pruning ratio is 0.99.

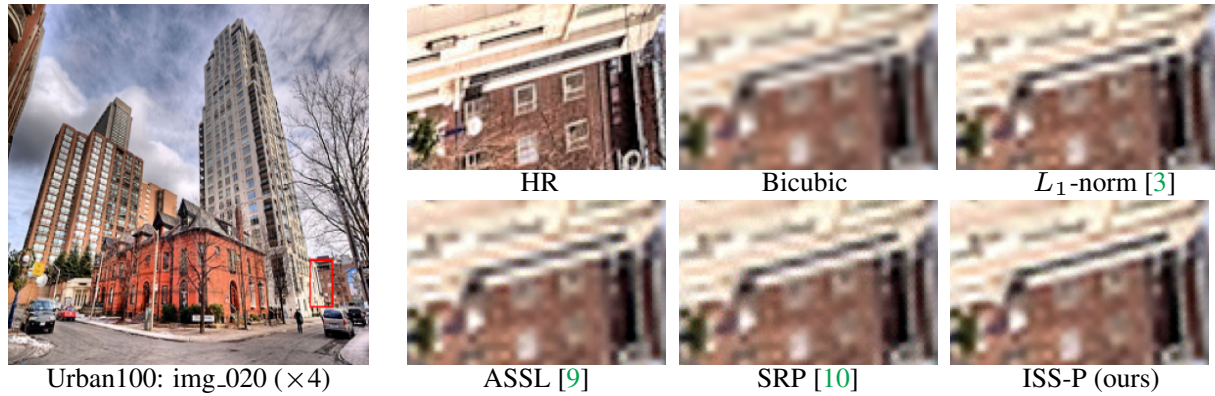

Figure 4. Visualization comparison of different pruning methods on Urban100 [1] dataset. The pruning ratio is 0.99.

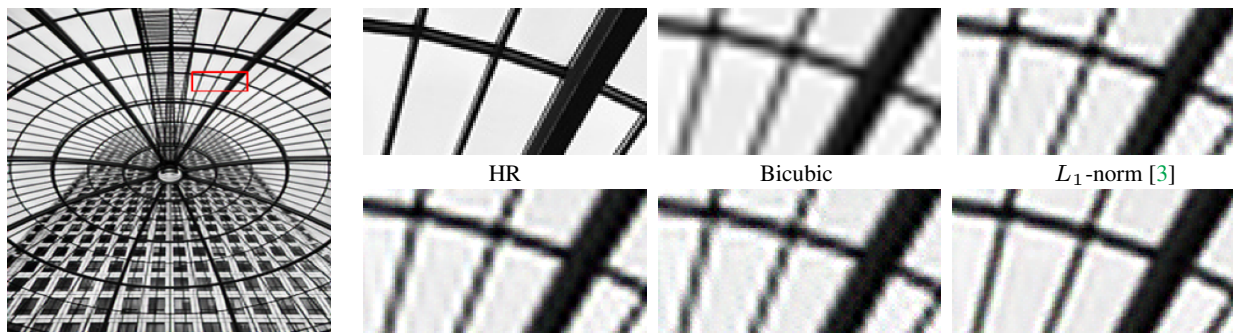

Urban100: img\_072 ( $\times 4$ )

Figure 5. Visualization comparison of different pruning methods on Urban100 [1] dataset. The pruning ratio is 0.99.

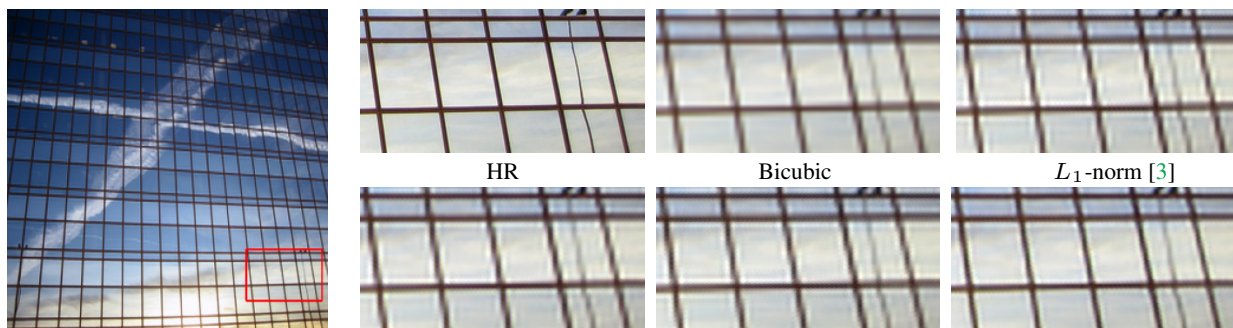

Urban100: img\_055 ( $\times 4$ )

Figure 6. Visualization comparison of different pruning methods on Urban100 [1] dataset. The pruning ratio is 0.99.

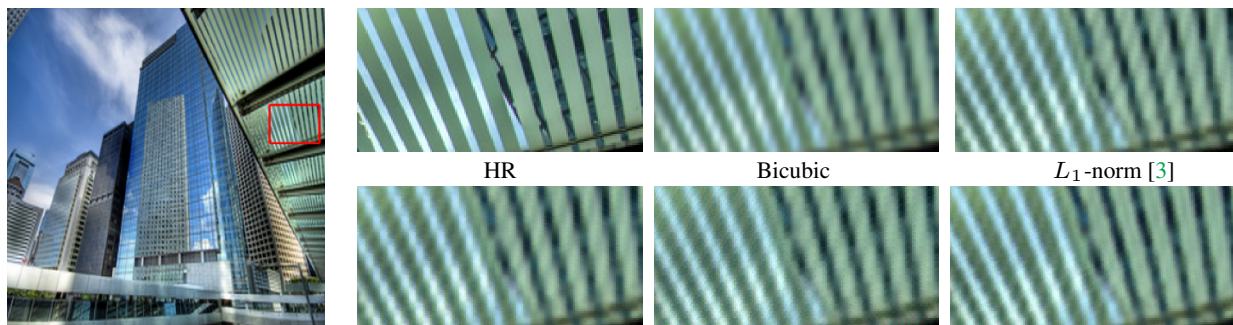

Urban100: img\_061 ( $\times 4$ )

Figure 7. Visualization comparison of different pruning methods on Urban100 [1] dataset. The pruning ratio is 0.99.

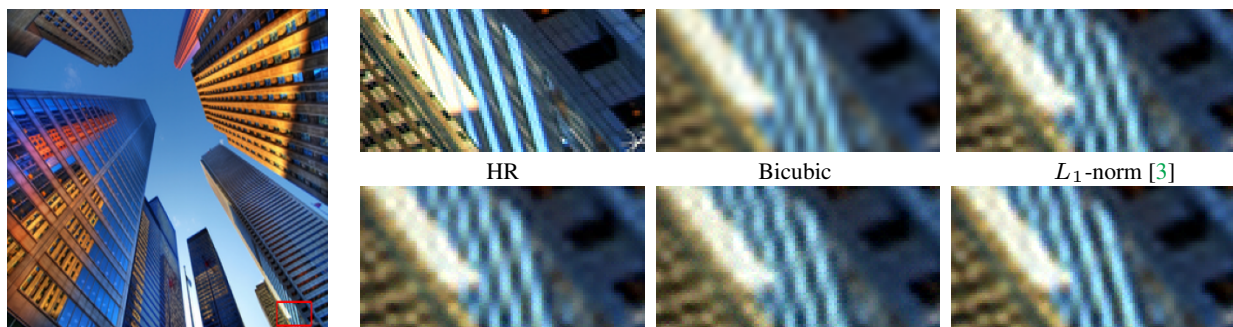

Urban100: img\_012 ( $\times 4$ )

Figure 8. Visualization comparison of different pruning methods on Urban100 [1] dataset. The pruning ratio is 0.99.

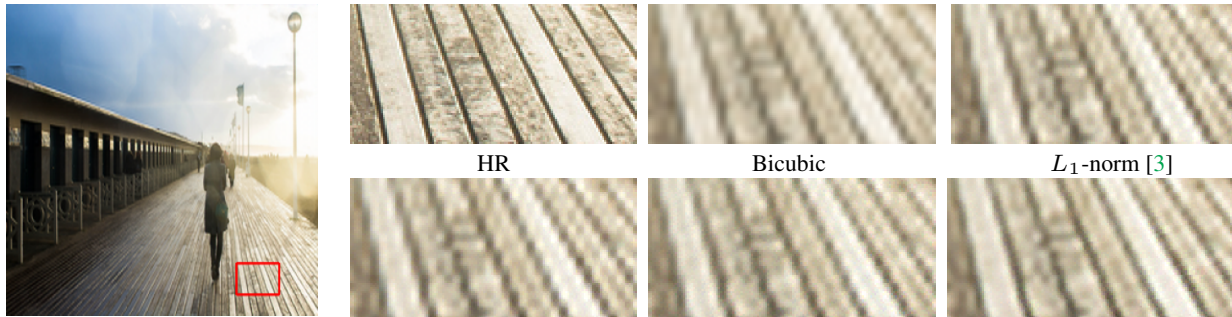

Urban100: img\_032 ( $\times 4$ )

Figure 9. Visualization comparison of different pruning methods on Urban100 [1] dataset. The pruning ratio is 0.99.

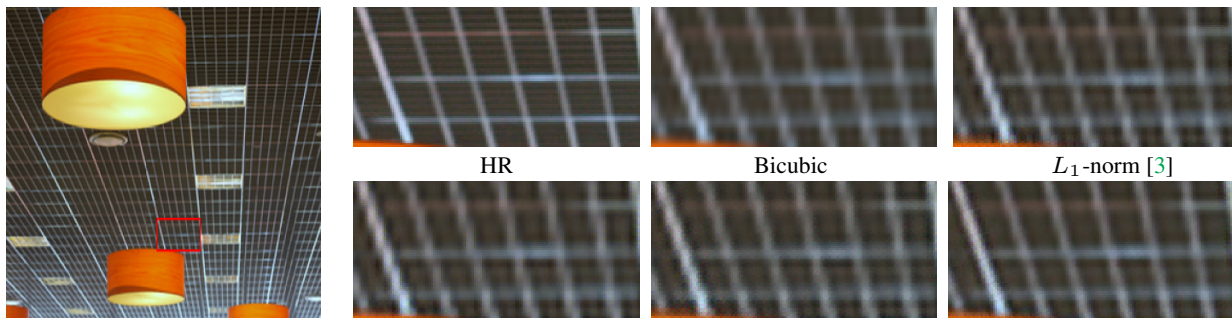

Urban100: img\_044 ( $\times 4$ )

Figure 10. Visualization comparison of different pruning methods on Urban100 [1] dataset. The pruning ratio is 0.99.

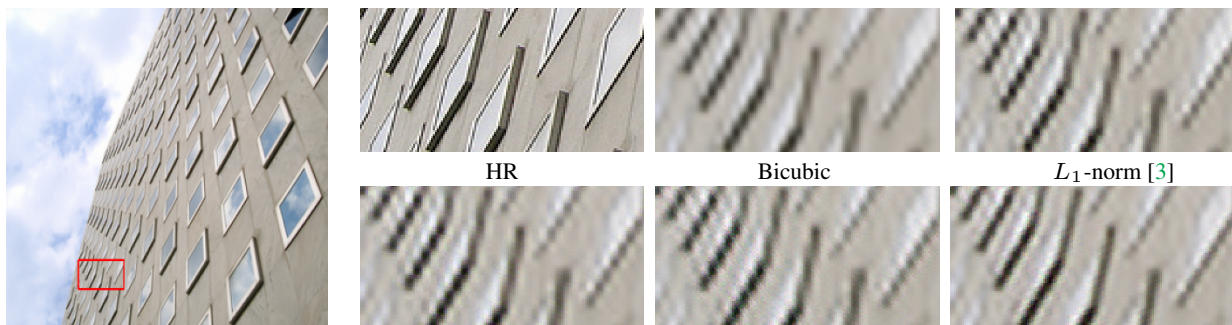

Urban100: img\_010 ( $\times 4$ )

Figure 11. Visualization comparison of different pruning methods on Urban100 [1] dataset. The pruning ratio is 0.99.

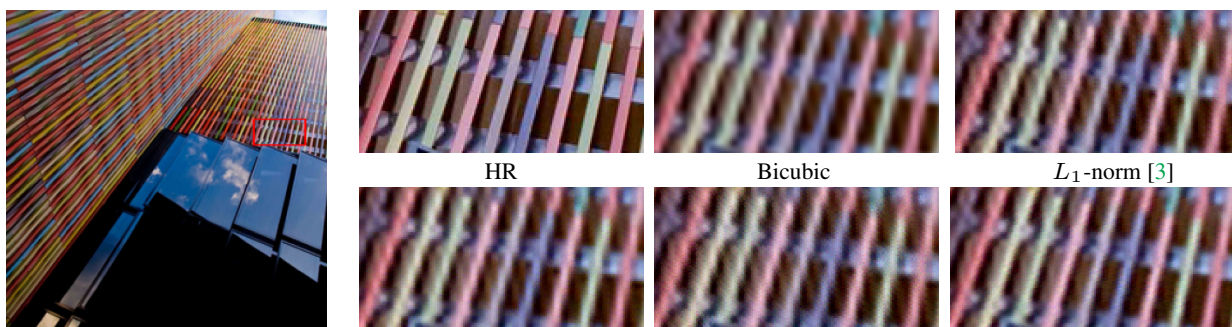

Urban100: img\_023 ( $\times 4$ )

Figure 12. Visualization comparison of different pruning methods on Urban100 [1] dataset. The pruning ratio is 0.99.

## References

- [1] Jia-Bin Huang, Abhishek Singh, and Narendra Ahuja. Single image super-resolution from transformed self-exemplars. In *CVPR*, 2015. 3, 4, 5
- [2] Itay Hubara, Brian Chmiel, Moshe Island, Ron Banner, Joseph Naor, and Daniel Soudry. Accelerated sparse neural training: A provable and efficient method to find  $n$ :  $m$  transposable masks. In *NeurIPS*, 2021. 1
- [3] Hao Li, Asim Kadav, Igor Durdanovic, Hanan Samet, and Hans Peter Graf. Pruning filters for efficient convnets. In *ICLR*, 2017. 2, 3, 4, 5
- [4] Jingyun Liang, Jiezhong Cao, Guolei Sun, Kai Zhang, Luc Van Gool, and Radu Timofte. Swinir: Image restoration using swin transformer. In *ICCV*, 2021. 2
- [5] Bee Lim, Sanghyun Son, Heewon Kim, Seungjun Nah, and Kyoung Mu Lee. Enhanced deep residual networks for single image super-resolution. In *CVPR workshop*, 2017. 1, 2
- [6] Asit Mishra, Jorge Albericio Latorre, Jeff Pool, Darko Stosic, Dusan Stosic, Ganesh Venkatesh, Chong Yu, and Paulius Micikevicius. Accelerating sparse deep neural networks. *arXiv preprint arXiv:2104.08378*, 2021. 1
- [7] Junghun Oh, Heewon Kim, Seungjun Nah, Cheeun Hong, Jonghyun Choi, and Kyoung Mu Lee. Attentive fine-grained structured sparsity for image restoration. In *CVPR*, 2022. 1, 2
- [8] Tim Salimans and Durk P Kingma. Weight normalization: A simple reparameterization to accelerate training of deep neural networks. *Advances in neural information processing systems*, 29, 2016. 1
- [9] Yulun Zhang, Huan Wang, Can Qin, and Yun Fu. Aligned structured sparsity learning for efficient image super-resolution. In *NeurIPS*, 2021. 1, 2, 3, 4, 5
- [10] Yulun Zhang, Huan Wang, Can Qin, and Yun Fu. Learning efficient image super-resolution networks via structure-regularized pruning. In *ICLR*, 2022. 1, 2, 3, 4, 5
